# Supplementary material for: Copper nanoparticles induce zebrafish intestinal defects via endoplasmic reticulum and oxidative stress
Source: Royal Society of Chemistry journal article supplement (doi:10.1039/c9mt00210c), 2019-11-28
Supplement: c9mt00210c1.pdf [file c9mt00210c1.pdf]

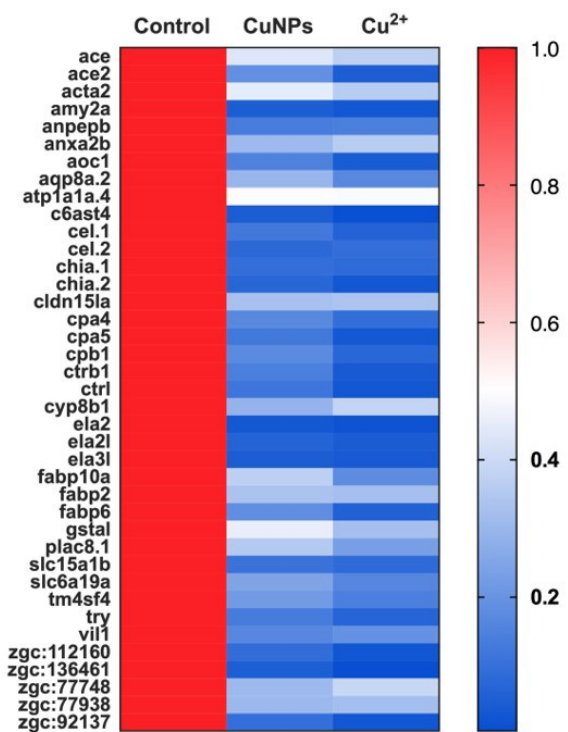

**Figure.1s** Down-regulated intestinal genes in Cu<sup>2+</sup> or CuNPs stressed embryos were screened by RNA-Seq assays and were clustered.
